# Supplementary figures and images for: Clonal Diversity and Antimicrobial Resistance of Methicillin-Resistant Staphylococcus pseudintermedius Isolated from Canine Pyoderma
Source: MDPI journal article supplement (doi:10.3390/microorganisms9030482), 2021-02-25

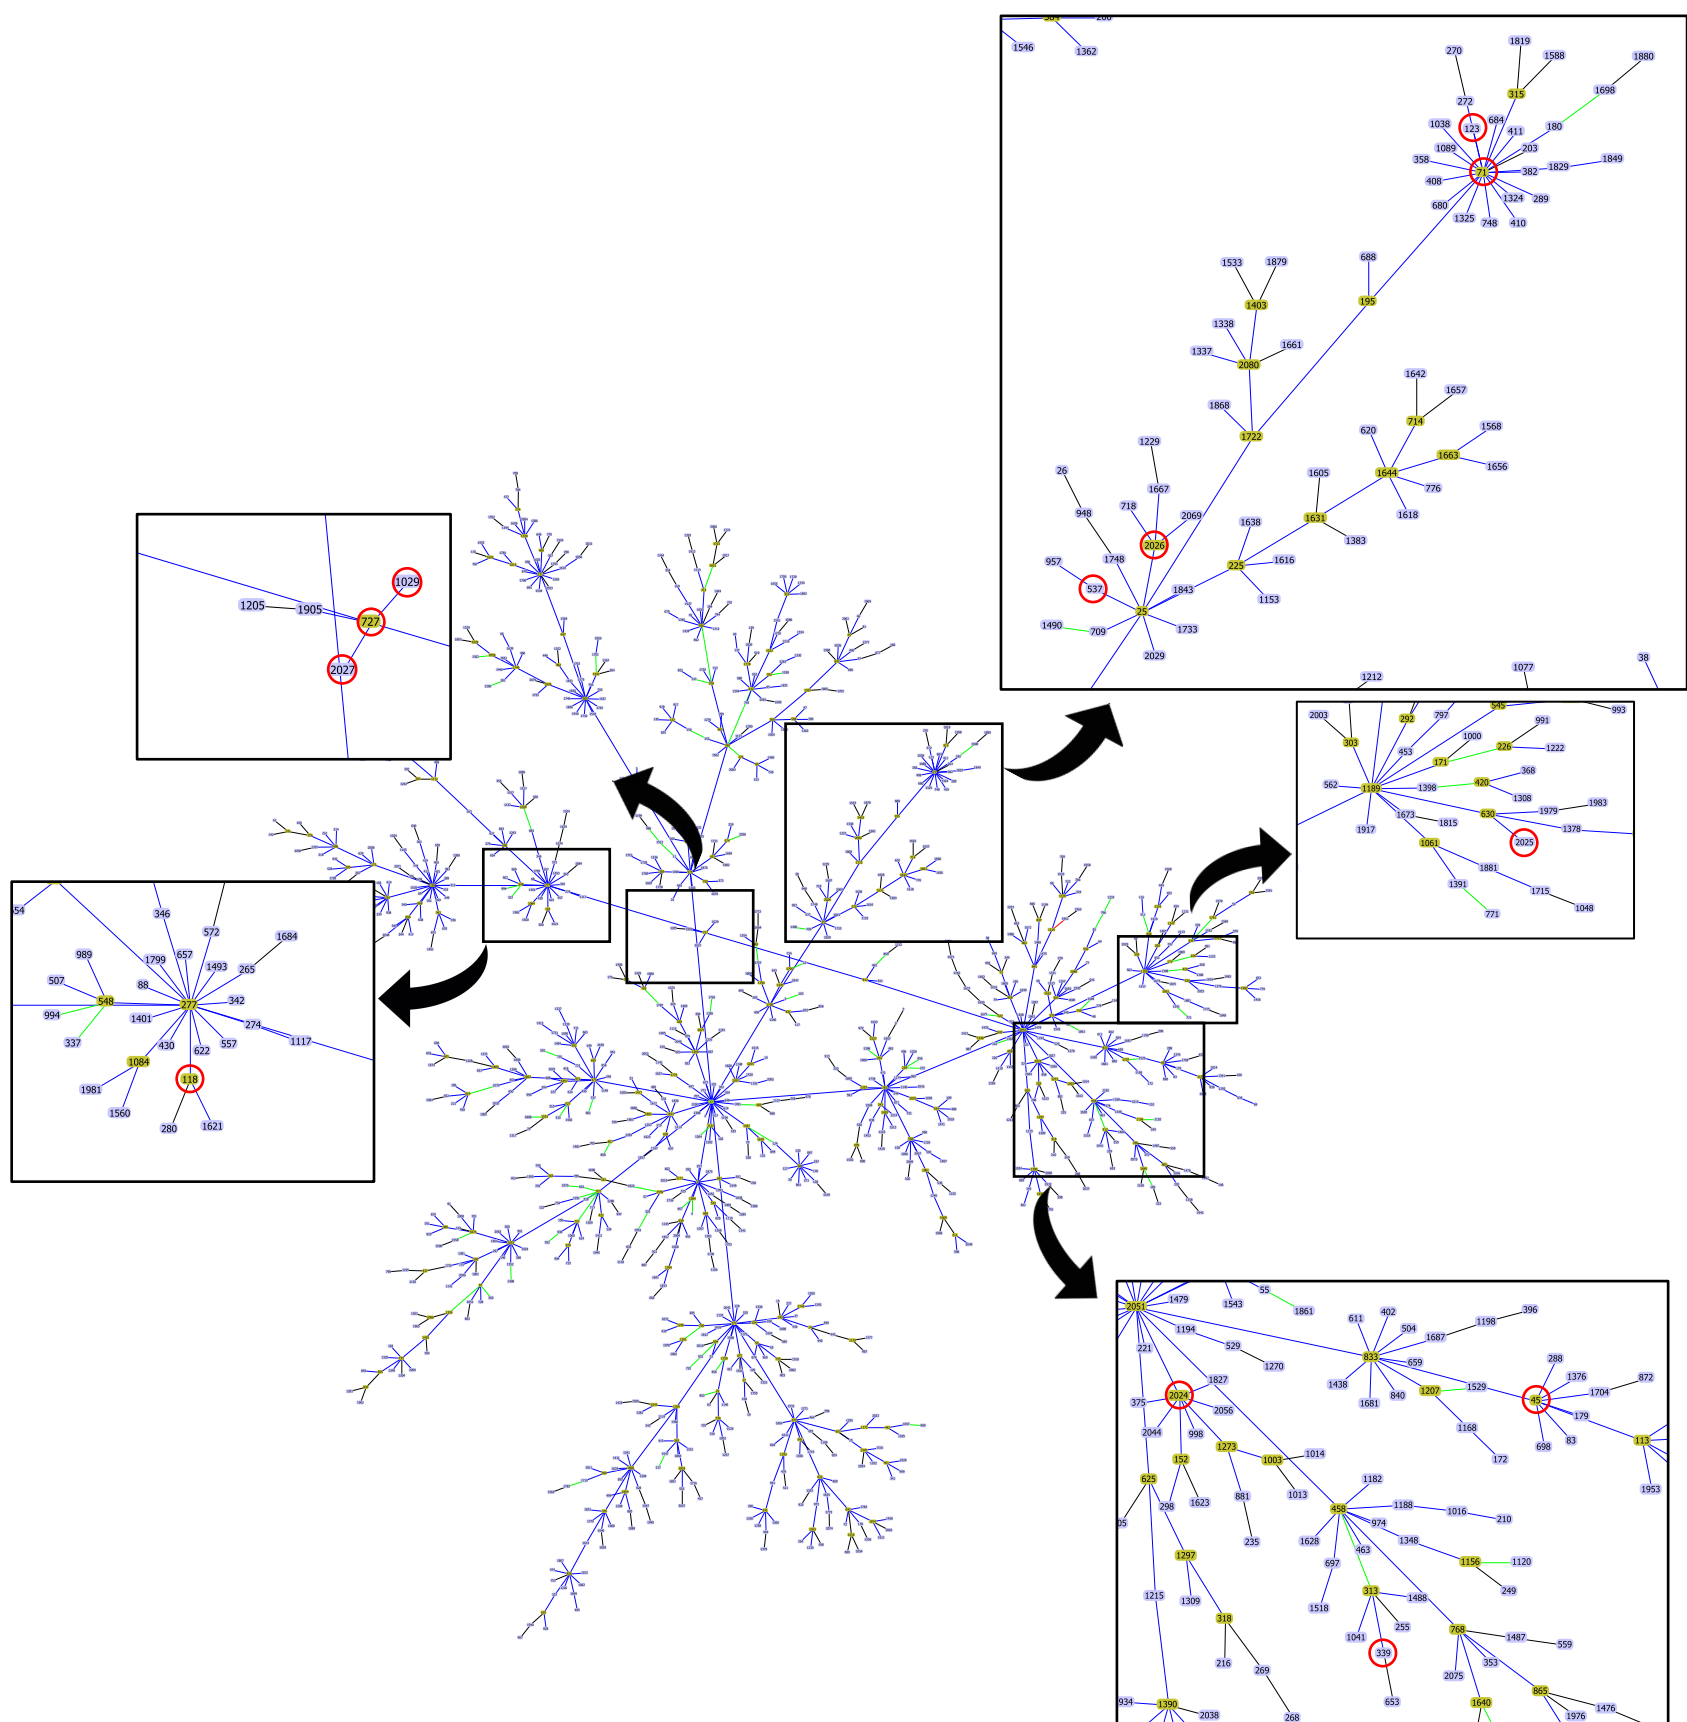

Supplement: s1 [file s1]
